# Supplementary material
Source: PubMed Central journal article supplement (PMC6151272)

Supplement 1

*Flow of Patients through the Clinical Trial*

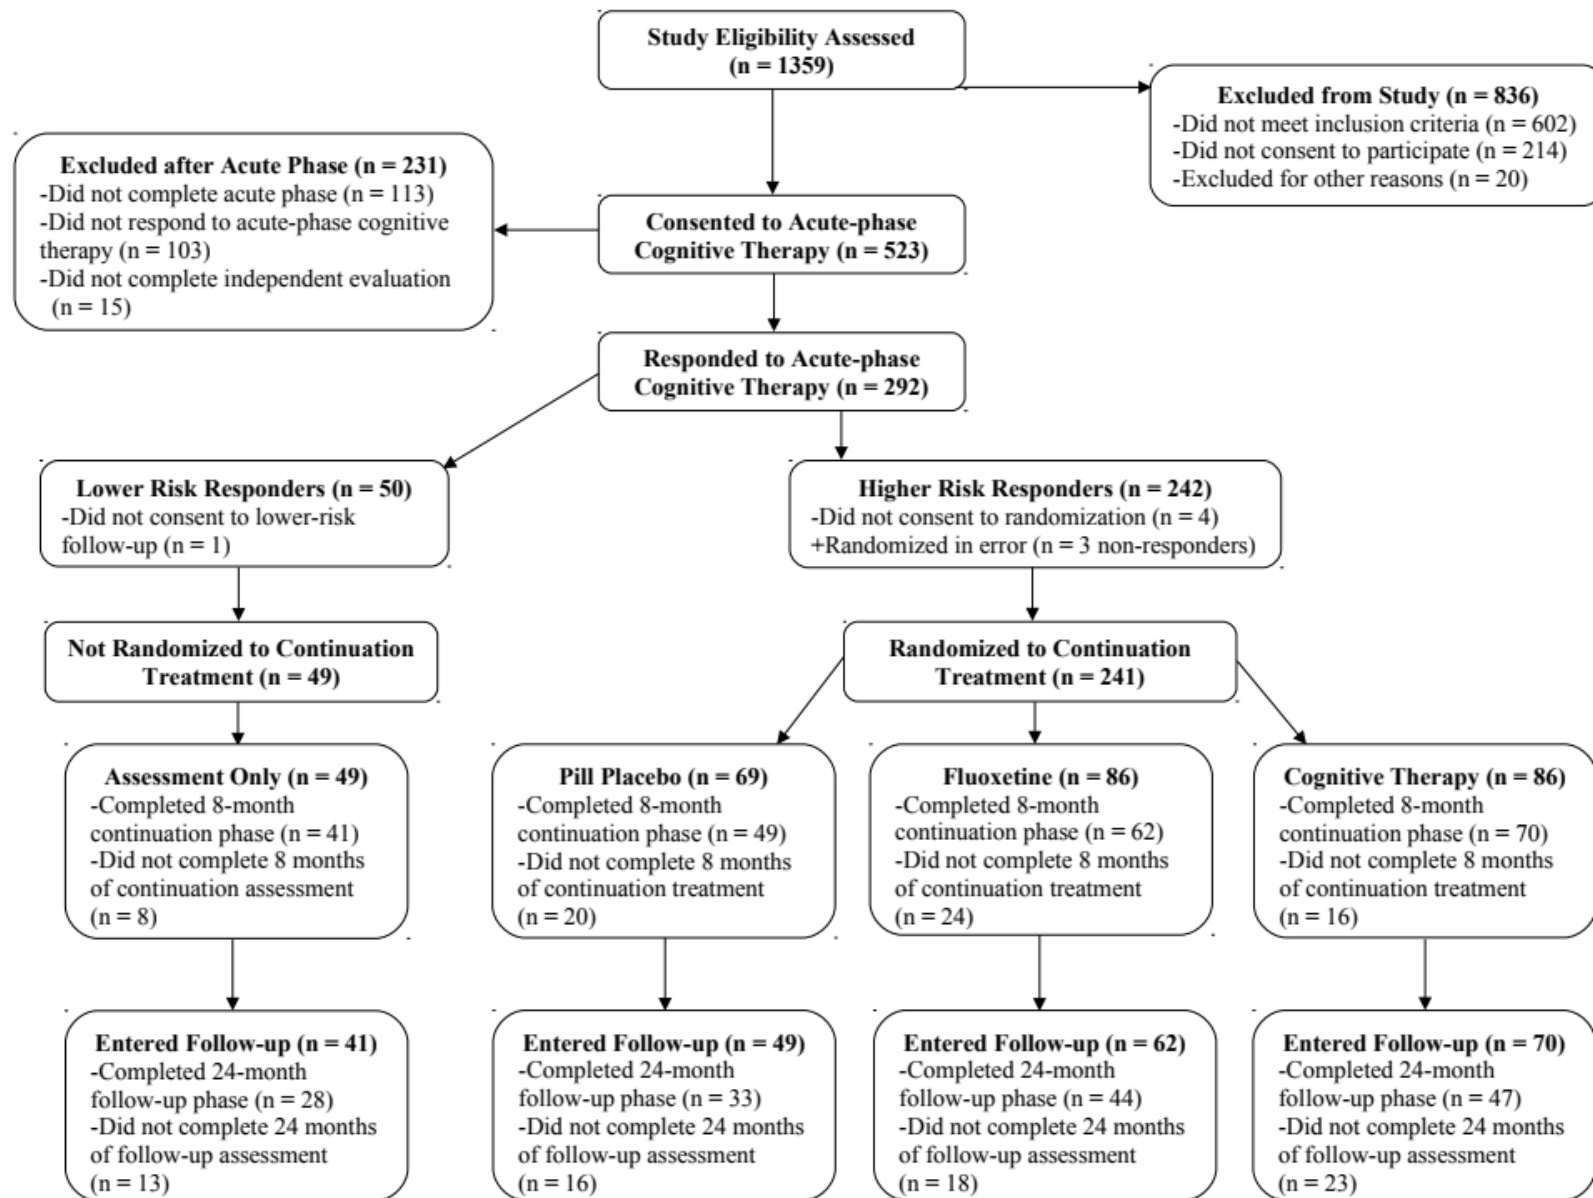

Supplement: NIHMS1505765-supplement-1.pdf [file NIHMS1505765-supplement-1.pdf]
